# Supplementary material
Source: PubMed Central journal article supplement (PMC2967712)
Supplement: NIHMS31066-supplement-suppmat.pdf [file NIHMS31066-supplement-suppmat.pdf]

| host - symbiont                                                                                                                                                        | common host name       | Symbiont genome size (Mb)/ GC content (%) | symbiont location                                            | transmission* | host life cycle stage in which infection occurs/entry site                                                                                            | References                |
|------------------------------------------------------------------------------------------------------------------------------------------------------------------------|------------------------|-------------------------------------------|--------------------------------------------------------------|---------------|-------------------------------------------------------------------------------------------------------------------------------------------------------|---------------------------|
| <i>Anthocerus punctatus</i> - <i>Nostoc punctiforme</i>                                                                                                                | hornwort               | 8.9/41.5%                                 | extracellular, slime cavities of gametophyte thallus         | H             | gametophyte/ stomata-like openings                                                                                                                    | reviewed in Refs1,2       |
| <i>Gunnera</i> spp. - <i>Nostoc punctiforme</i>                                                                                                                        | giant rhubarb          | 8.9/41.5%                                 | intracellular, red gland                                     | H             | seedling/mucilage secreted by red gland at the base of each new leaf petiole                                                                          | reviewed in Refs2,3       |
| <i>Leptochloa fusca</i> - <i>Azoarcus</i> spp.                                                                                                                         | Kallar grass           | 4.3/68% (BH72 strain)                     | intracellular, stele                                         | H             | seedling stage throughout adulthood/ emergence points of lateral roots or elongation and differentiation zone of root tip                             | 4 reviewed in Ref.5       |
| <i>Medicago truncatula</i> - <i>Sinorhizobium meliloti</i> ; <i>Lotus japonicus</i> - <i>Mesorhizobium loti</i> ; <i>Vicia sativa</i> - <i>Rhizobium leguminosarum</i> | legume                 | 3.6/62%; 7/62%; 4.5/61%                   | intracellular, indeterminate or determinate nodules          | H             | seedling stage throughout adulthood/ root hairs curling or epidermal cracks penetration                                                               | 6, reviewed in 7-9        |
| <i>Riftia pachyptila</i> - <i>Candidatus Endoriftia persephone</i>                                                                                                     | giant tubeworm         | 3.3/60%                                   | intracellular, mesodermal trophosome                         | H             | larva/skin                                                                                                                                            | 10,11                     |
| <i>Siboglinum poseidoni</i> - methanotroph bacterium                                                                                                                   | beard worm             | NA                                        | intracellular, endodermal trophosome                         | H             | larva/oral opening or anus                                                                                                                            | 12                        |
| <i>Riptortus clavatus</i> - <i>Burkholderia</i>                                                                                                                        | broad-headed bug       | NA                                        | extracellular, midgut crypts                                 | H             | newborn nymph/oral opening                                                                                                                            | 13                        |
| <i>Codakia orbicularis</i> - thiotroph <i>Gammaproteobacterium</i>                                                                                                     | lucinid clam           | NA                                        | intracellular, ectodermal gills                              | H             | juvenile/gill epithelium                                                                                                                              | 14-16                     |
| <i>Bathymodiolus</i> ssp. - thiotroph <i>Gammaproteobacterium</i>                                                                                                      | bathymodiolin mussel   | 1.9-2/34-38% ( <i>B. thermophilus</i> )   | intracellular, ectodermal gills                              | H             | juvenile/gill epithelium                                                                                                                              | 17-21                     |
| <i>Euprymna scolopes</i> - <i>Vibrio fischeri</i>                                                                                                                      | Hawaiian bobtail squid | 4.2/38% (ES114 strain)                    | extracellular, light organ crypts                            | H             | juvenile within 12 hr post-hatching/ pores on the surface of the developing light organ                                                               | 22,23, reviewed in Ref.24 |
| <i>Danio rerio</i> – complex consortium <i>Aeromonas</i> and <i>Pseudomonas</i> spp. dominating                                                                        | zebrafish              | NA                                        | extracellular, gut lumen                                     | H             | larva, 1 day after oral opening disclosure/ oral opening                                                                                              | 25                        |
| <i>Azolla mexicana</i> - simple consortium including <i>Anabaena azollae</i>                                                                                           | water fern             | NA                                        | extracellular, leaf cavity of dorsal lobe of bilobed leaf    | Vm            | during sexual sporulation, symbionts are transferred from the dorsal lobe of the leaf to developing sporocarps; inoculation chamber in metasporocarps | 26,27                     |
| <i>Halisarca dujardini</i> - consortium, low-microbial-abundance (LMA)                                                                                                 | sponge                 | NA                                        | extracellular, mesohyl; intracellular in eggs, early embryos | Vm            | embryo/ concentration of symbionts in blastocoel and uptake via endocytosis into eggs                                                                 | 28                        |
| <i>Oscarella</i> ssp. - consortium                                                                                                                                     | sponge                 | NA                                        | extracellular, mesohyl                                       | Vm            | early embryo (before follicle differentiation)/migration of symbionts to eggs                                                                         | 29                        |
| <i>Hippospongia lachne</i> , <i>Spongia</i> ssp. - consortium, high-microbial-abundance (HMA)                                                                          | sponge                 | NA                                        | extracellular, mesohyl                                       | Vm            | early embryo/incorporation of symbionts via migration of symbionts along 'collagen-like' connections between nurse cells and embryo                   | 30,31                     |

|                                                                                                                                                                            |                            |                                                                                 |                                                                          |          |                                                                                                                          |                                            |
|----------------------------------------------------------------------------------------------------------------------------------------------------------------------------|----------------------------|---------------------------------------------------------------------------------|--------------------------------------------------------------------------|----------|--------------------------------------------------------------------------------------------------------------------------|--------------------------------------------|
| <i>Heterorhabditis bacteriophora</i> - <i>Photorhabdus luminescens</i>                                                                                                     | entomopathogenic nematode  | 5.7/43%                                                                         | extracellular, gut lumen                                                 | Vm       | infective juvenile/oral opening, symbionts from insect carcass                                                           | 32,33                                      |
| <i>H. medicinalis</i> / <i>H. verdana</i> - <i>Aeromonas veronii</i> biovar <i>sobria</i> , <i>Rikenella</i> -like <i>Bacteroidetes</i>                                    | medical leech              | 4.7/58.5% ( <i>Aeromonas veronii</i> )                                          | extracellular, gut lumen                                                 | Vm       | embryos in cocoon/oral opening ( <i>A. veronii</i> )                                                                     | 34,35**                                    |
| <i>Calyplogena magnifica</i> - <i>Candidatus</i> <i>Ruthia magnifica</i> ; <i>C. okutanii</i> - <i>C. okutanii</i> symbiont                                                | vesicomyid clam            | 1.2/34% ( <i>Cand. Ruthia magnifica</i> ); 1/32% ( <i>C. okutanii</i> symbiont) | intracellular, ectodermal gills                                          | Vm       | embryo/follicle cells                                                                                                    | 36-39                                      |
| <i>Bankia setacea</i> - <i>Gammaproteobacterium</i>                                                                                                                        | shipworm                   | NA                                                                              | intracellular, ectodermal gills                                          | Vm       | egg/unknown                                                                                                              | 40                                         |
| <i>Eisenia foetida</i> - <i>Verminephrobacter eiseniae</i>                                                                                                                 | earthworm                  | 5.6/65%                                                                         | extracellular, nephridial lumen                                          | Vm       | embryo in egg capsule/ transient dorsal pore and subepithelial canal in which symbiont migrate to ventral nephridiopores | 41,42***                                   |
| <i>Sitophilus oryza</i> - <i>Sitophilus oryza</i> principal symbiont (SOPE)                                                                                                | rice weevil                | 3/54%                                                                           | intracellular, mesodermal bacteriome in caeca and female gonad           | Vm       | embryo/during development some symbionts goes in putative gonad, some in bacteriome                                      | 43-45                                      |
| <i>Pediculus humanus</i> - <i>Candidatus</i> <i>Riesia pediculicola</i>                                                                                                    | louse                      | NA                                                                              | intracellular, endodermal bacteriome in gut                              | Vm       | oocyte/posterior pole                                                                                                    | 46-48                                      |
| <i>Acrytosiphon pisum</i> - <i>Buchnera aphidicola</i>                                                                                                                     | aphid                      | 0.4-0.6/20-26% (APS,Sg,Bp,Cc strains)                                           | intracellular, bacteriocytes in hemocoel                                 | Vm       | sexual egg or pathogenetic embryo ( <i>A. buchnera</i> )posterior pole; embryo/blastocoel (other species)                | 49,50<br>reviewed in Refs <sup>51,52</sup> |
| <i>Glossina morsitans</i> - <i>Wiggelsworthia glossinidia</i>                                                                                                              | tsetse fly                 | 0.7/22%                                                                         | intracellular, endodermal bacteriome in gut                              | Vm       | larva/oral opening via infected milk                                                                                     | 53,54                                      |
| <i>Blattella germanica</i> , <i>Periplaneta americana</i> , <i>Blatta orientalis</i> - <i>Bacteroidetes</i> , <i>Flavobacteria</i> , <i>Blattabacterium</i>                | cockroach                  | NA                                                                              | intracellular, mesodermal bacteriocytes in fat body                      | Vm       | oocyte/prior ovulation in adult                                                                                          | reviewed in Ref. 55                        |
| <i>Chondrilla australiensis</i> - complex consortium, including <i>Candidatus</i> <i>Synechococcus spongiiarum</i>                                                         | sponge                     | NA                                                                              | extracellular, mesohyl; intracellular in nurse cells, eggs, sperms       | Vb + H*  | early embryo/uptake of symbionts into nurse cells via endocytosis, infected nurse cells fuse with eggs                   | 56,57                                      |
| <i>Ectyoplasia ferox</i> - complex consortium, high microbial abundance (HMA)                                                                                              | sponge                     | NA                                                                              | extracellular, mesohyl; intracellular in nurse cells                     | Vm + H*  | nurse cells surrounding oocyte/unknown                                                                                   | 58                                         |
| <i>Steinernema carpocapsae</i> - <i>Xenorhabdus nematophila</i>                                                                                                            | entomopathogenic nematode  | 4.4/43-44%                                                                      | extracellular, lumen between two anteriormost intestinal cells (vesicle) | PV + H*? | infective juvenile/oral opening, symbionts from nematode population in insect carcass                                    | reviewed in Ref.59                         |
| <i>Solemya reidi</i> , <i>S. velum</i> - thiotroph <i>Gammaproteobacterium</i>                                                                                             | solemyid awning clam       | ONGOING ( <i>S. reidi</i> )                                                     | intracellular, ectodermal gills                                          | Vm + H*  | egg/unknown                                                                                                              | 60-63                                      |
| <i>Olavius</i> and <i>Inanidrilus</i> spp.; <i>O. algarvensis</i> - simple consortium, including <i>Gammaproteobacteria</i> 1 and 3 and <i>Deltaproteobacteria</i> 1 and 4 | marine gutless oligochaete | 4.6-13.5 /49.2-57.5%                                                            | extracellular, subcuticular                                              | Vm + H*? | egg/external smearing ( <i>I. leukodermatus</i> )                                                                        | 64,65                                      |

|                                                                                                                                                   |                       |                                                                                                                                          |                                                            |                                        |                                                                                                                        |                             |
|---------------------------------------------------------------------------------------------------------------------------------------------------|-----------------------|------------------------------------------------------------------------------------------------------------------------------------------|------------------------------------------------------------|----------------------------------------|------------------------------------------------------------------------------------------------------------------------|-----------------------------|
| <i>Acrytosiphon pisum</i> - <i>Candidatus</i> Hamiltonella defensa, <i>Candidatus</i> Serratia symbiotica, <i>Candidatus</i> Regiella insecticola | aphid                 | 1.7/NA; ( <i>Cand.</i> Hamiltonella defensa); ONGOING ( <i>Cand.</i> Serratia symbiotica); NA ( <i>Cand.</i> Regiella insecticola)       | intracellular, mesodermal bacteriocytes                    | Vm (parthenogenesis); Vb (sexual) + H* | symbiont in ejaculate of potentially several males (including the father) but not in sperms                            | 66,67                       |
| <i>Drosophila melanogaster</i> - <i>Wolbachia pipientis</i>                                                                                       | fruit fly             | 1.3/35% ( <i>wMel</i> strain)                                                                                                            | intracellular, reproductive tissue                         | Vm + H*                                | oocyte/via nurse or follicle cells                                                                                     | reviewed in Refs 51, 52, 68 |
| <i>Bemisia tabaci</i> – <i>Portiereia aleyrodidarum</i> , several other symbionts                                                                 | sweet potato whitefly | NA                                                                                                                                       | intracellular, mesodermal bacteriome                       | Vm + H*                                | oocyte/oocyte engulfs intact bacteriocytes                                                                             | reviewed in Ref. 69         |
| <i>Glossina morsitans</i> - <i>Sodalis glossinidius</i>                                                                                           | tsetse fly            | 4/54%                                                                                                                                    | intracellular, multiple tissues                            | Vm + H*                                | larva/oral opening via infected milk                                                                                   | 54, 70, 71                  |
| <i>Bugula neritina</i> - <i>Candidatus</i> Endobugula sertula                                                                                     | bryozoan              | NA                                                                                                                                       | extracellular, pallial sinus larva, funicular chords adult | Vm + H*                                | embryo/ most likely through funicular cords                                                                            | 72                          |
| <i>Diplosoma simile</i> - <i>Prochloron didemni</i>                                                                                               | didemnid ascidian     | ONGOING                                                                                                                                  | extracellular, cloacal cavity and peribranchial space      | Vm + H*                                | unhatched larva (with rastrum)/NA                                                                                      | 73                          |
| <i>Didemnum molle</i> - <i>Prochloron didemni</i>                                                                                                 | didemnid ascidian     | ONGOING                                                                                                                                  | extracellular, cloacal cavity and peribranchial space      | Vm + H*                                | hatched larva/NA                                                                                                       | 74                          |
| <i>Lissoclinum bistratum</i> - <i>Prochloron didemni</i>                                                                                          | didemnid ascidian     | ONGOING                                                                                                                                  | extracellular, cloacal cavity and peribranchial space      | Vm + H*                                | unhatched larva/NA                                                                                                     | 75                          |
| <i>Trididemnum miniatum</i> - <i>Prochloron didemni</i>                                                                                           | didemnid ascidian     | ONGOING                                                                                                                                  | extracellular in tunic; intracellular in amoebocytes       | Vm + H*                                | prehatching embryo/ in tunic, amoebocytes act as transport vehicles across epidermis and embryonic pouch               | 76                          |
| <i>Homo sapiens</i> – complex consortium, <i>Bacteroidetes</i> and <i>Firmicutes</i> dominating                                                   | human                 | 6.3/42% ( <i>Bacteroides thetaiotaomicron</i> ); 5.2 /42% ( <i>Bacteroides vulgatus</i> ); 4.8/48% ( <i>Parabacteroides distasonis</i> ) | extracellular, gut lumen                                   | Vm + H                                 | newborn to infant/oral opening (initial microbiota from the vagina and feces of their mothers, successively from food) | 77 reviewed in Refs 78, 79  |

\* H horizontal from environment, H\* additional horizontal transmission (indicated by lack of cospeciation), Vm vertical maternal, Vb vertical biparental, PV pseudivertical

\*\* Human Genome Meeting (HGM) 2005, Poster 158, Kurokawa et al.

\*\*\* <http://www.ncbi.nlm.nih.gov/sites/entrez?Db=genome&Cmd=ShowDetailView&TermToSearch=20277>

1. Adams, D. G. & Duggan, P. S. Cyanobacteria–bryophyte symbioses. *J. Exp. Bot.* **59**, 1047–1058 (2008).
2. Meeks, J. C. *et al.* An overview of the genome of *Nostoc punctiforme*, a multicellular, symbiotic cyanobacterium. *Photosyn. Res.* **70**, 85–106 (2001).
3. Adams, D. G., Bergman, B., Nierzwicki-Bauer, S. A., Rai, A. N. & Schüßler, A. in *The Prokaryotes* 331–363 (Springer, New York, 2006).
4. Krause, A. *et al.* Complete genome of the mutualistic, N<sub>2</sub>-fixing grass endophyte *Azoarcus* sp. strain BH72. *Nature Biotechnol.* **24**, 1385–1391 (2006).
5. Hurek, T. & Reinhold-Hurek, B. *Azoarcus* sp. strain BH72 as a model for nitrogen-fixing grass endophytes. *J. Biotechnol.* **106**, 169–178 (2003).

6. Young, J. P., C. L. & Johnston, A. W. *et al.* The genome of *Rhizobium leguminosarum* has recognizable core and accessory components. *Genome Biol.* **7**, R34 (2006).
7. Gage, D. J. Infection and invasion of roots by symbiotic, nitrogen-fixing rhizobia during nodulation of temperate legumes. *Microbiol. Mol. Biol. Rev.* **68**, 280–300 (2004).
8. Jones, K. J., Kobayashi, H., Davies, B. W., Taga, M. E. & Walker, G. C. How rhizobial symbionts invade plants: the *Sinorhizobium-Medicago* model. *Nature Rev. Microbiol.* **5**, 619–633 (2007).
9. Goormachtig, S., Capoen, W. & Holsters, M. Rhizobium infection: lessons from the versatile nodulation behaviour of water-tolerant legumes. *Trends Plant Sci.* **9**, 518–522 (2004).
10. Nussbaumer, A. D., Fisher, C. R. & Bright, M. Horizontal endosymbiont transmission in hydrothermal vent tubeworms. *Nature* **441**, 345–348 (2006).
11. Robidart, J. C. *et al.* Metabolic versatility of the *Riftia pachyptila* endosymbiont revealed through metagenomics. *Environ. Microbiol.* **10**, 727–737 (2008).
12. Callsen-Cencic, P. & Flügel, H. J. Larval development and the formation of the gut of *Siboglinum poseidoni* Flügel & Langhof (Pogonophora, Perviiata). Evidence of protostomian affinity. *Sarsia* **80**, 73–89 (1995).
13. Kikuchi, Y., Hosokawa, T. & Fukatsu, T. Insect-microbe mutualism without vertical transmission: a stinkbug acquires a beneficial gut symbiont from the environment every generation. *Appl. Environ. Microbiol.* **73**, 4308–4316 (2007).
14. Gros, O., Darrasse, A., Durand, P., Frenkiel, L. & Moueza, M. Environmental transmission of a sulfur-oxidizing bacterial gill endosymbiont in the tropical lucinid bivalve *Codakia orbicularis*. *Appl. Environ. Microbiol.* **62**, 2324–2330 (1996).
15. Gros, O., Liberge, M. & Felbeck, H. Interspecific infection of aposymbiotic juveniles of *Codakia orbicularis* by various tropical lucinid gill-endosymbionts. *Mar. Biol.* **142**, 57–66 (2003).
16. Frenkiel, L. & Mouëza, M. Gill ultrastructure and symbiotic bacteria in *Codakia orbicularis* (Bivalvia, Lucinidae). *Zoomorphology* **115**, 51–61 (1995).
17. Won, Y.-J., Jones, W. J. & Vrijenhoek, R. C. Absence of cospeciation between deep-sea mytilids and their thiotrophic endosymbionts. *J. Shellfish Res.* **27**, 129–138 (2008).
18. Belkin, S., Nelson, D. C. & Jannasch, H. W. Symbiotic assimilation of CO<sub>2</sub> in two hydrothermal vent animals, the mussel *Bathymodiolus thermophilus* and the tube worm *Riftia pachyptila*. *Biol. Bull.* **170**, 110–121 (1986).
19. Won, Y.-J. *et al.* Environmental acquisition of thiotrophic endosymbionts by deep-sea mussels of the genus *Bathymodiolus*. *Appl. Environ. Microbiol.* **69**, 6785–6792 (2003).
20. Kádár, E. *et al.* Experimentally induced endosymbiont loss and re-acquirement in the hydrothermal vent bivalve *Bathymodiolus azoricus*. *J. Exp. Mar. Biol. Ecol.* **318**, 99–110 (2005).
21. DeChaine, E. G., Bates, A. E., Shank, T. M. & Cavanaugh, C. M. Off-axis symbiosis found: characterization and biogeography of bacterial symbionts of *Bathymodiolus* mussels from Lost City hydrothermal vents. *Environ. Microbiol.* **8**, 1902–1912 (2006).
22. McCann, J., Stabb, E. V., Milikan, D. S. & Ruby, E. G. Population effects of *Vibrio fischeri* during infection of *Euprymna scolopes*. *Appl. Environ. Microbiol.* **69**, 5928–5934 (2003).
23. Ruby, E. G. *et al.* Complete genome sequence of *Vibrio fischeri*: a symbiotic bacterium with pathogenic congeners. *Proc. R. Soc. Lond., B, Biol. Sci.* **102**, 3004–3009 (2005).
24. Nyholm, S. V. & McFall-Ngai, M. The winnowing: establishing the Squid-*Vibrio* symbiosis. *Nature Rev. Microbiol.* **2**, 632–642 (2004).

25. Bates, J. M. *et al.* Distinct signals from the microbiota promote different aspects of zebrafish gut differentiation. *Dev. Biol.* **297**, 374–386 (2006).
26. Perkins, S. K. & Peters, G. A. The *Azolla-Anabaena* symbiosis: endophyte continuity in the *Azolla* life-cycle is facilitated by epidermal trichomes. I. Partitioning of the endophytic *Anabaena* into developing sporocarps. *New Phytol.* **123**, 53–64 (1993).
27. Peters, G. A. & Perkins, S. K. The *Azolla-Anabaena* symbiosis: endophyte continuity in the *Azolla* life-cycle is facilitated by epidermal trichomes. II. Re-establishment of the symbiosis following gametogenesis and embryogenesis. *New Phytol.* **123**, 65–75 (1993).
28. Ereskovsky, A. V., Gonobobleva, E. & Vishnyakov, A. Morphological evidence for vertical transmission of symbiotic bacteria in the viviparous sponge *Halisarca dujardini* Johnston (Porifera, Demospongiae, Halisarcida). *Mar. Biol.* **146**, 869–875 (2005).
29. Ereskovsky, A. V. & Boury-Esnault, N. Cleavage pattern in *Oscarella* species (Porifera, Demospongiae, Homoscleromorpha): transmission of maternal cells and symbiotic bacteria. *J. Nat. Hist.* **36**, 1761–1775 (2002).
30. Kaye, H. R. Sexual reproduction in four Caribbean commercial sponges. II. Oogenesis and transfer of bacterial symbionts. *Invertebr. Reprod. Dev.* **19**, 13–24 (1991).
31. Kaye, H. R. & Reiswig, H. M. Sexual reproduction in four Caribbean commercial sponges. III. Larval behaviour, settlement and metamorphosis. *Invertebr. Reprod. Dev.* **19**, 25–35 (1991).
32. Ciche, T. A., Kim, K.-s. & Kaufmann-Daszczuk, B. Cell invasion and matricide during *Photorhabdus luminescens* transmission by *Heterorhabditis bacteriophora* nematodes. *Appl. Environ. Microbiol.* **74**, 2275–2287 (2008).
33. Duchaud, E. *et al.* The genome sequence of the entomopathogenic bacterium *Photorhabdus luminescens*. *Nature Biotechnol.* **21**, 1307–1313 (2003).
34. Büsing, K.-H., Döll, W. & Freytag, K. Die Bakterienflora der medizinischen medizinischen Blutegel. *Arch. Mikrobiol.* **19**, 52–86 (1953).
35. Rio, R. V., Maltz, M., McCormick, B., Reiss, A. & Graf, J. Symbiont succession during the embryonic development of the european medicinal leech, *Hirudo verbana*. *Appl. Environ. Microbiol.* **5**, 6890–6895 (2009).
36. Cary, S. C. & Giovannoni, S. J. Transovarial inheritance of endosymbiotic bacteria in clams inhabiting deep-sea hydrothermal vents and cold seeps. *Proc. Natl Acad. Sci. USA* **90**, 5695–5699 (1993).
37. Stewart, F. J., Young, C. R. & Cavanaugh, C. M. Lateral symbiont acquisition in a maternally transmitted chemosynthetic clam endosymbiosis. *Mol. Biol. Evol.* **25**, 673–687 (2008).
38. Kuwahara, H. *et al.* Reduced genome of the thioautotrophic intracellular symbiont in a deep-sea clam, *Calyptogena okutanii*. *Curr. Biol.* **17**, 881–886 (2007).
39. Newton, I. L. G. *et al.* The *Calyptogena magnifica* chemoautotrophic symbiont genome. *Science* **315**, 998–1000 (2007).
40. Sipe, A. R., Wilbur, A. E. & Cary, S. C. Bacterial symbiont transmission in the wood-boring shipworm *Bankia setacea* (Bivalvia: Teredinidae). *Appl. Environ. Microbiol.* **66**, 1685–1691 (2000).
41. Davidson, S. K. & Stahl, D. A. Selective recruitment of bacteria during embryogenesis of an earthworm. *ISME J.* **2**, 510–518 (2008).
42. Davidson, S. K. & Stahl, D. A. Transmission of nephridial bacteria of the earthworm *Eisenia fetida*. *Appl. Environ. Microbiol.* **72**, 769–775 (2006).
43. Charles, H., Heddi, A., Guillaud, J., Nardon, C. & Nardon, P. A molecular aspect of symbiotic interactions between the weevil *Sitophilus oryzae* and its endosymbiotic bacteria: over-expression of a chaperonin. *Biochem. Biophys. Res.* **239**, 769–774 (1997).

44. Nardon, P. Contribution à l'étude des symbiotes ovaries de *Sitophilus sasakii*: localisation, histochimie et ultrastructure chez la femelle adults. *C. R. Acad. Sci. III, Sci.* **272**, 2975–2978 (1971).
45. Heddi, A., Charles, H., Khatchadourian, C., Bonnot, G. & Nardon, P. Molecular characterization of the principal symbiotic bacteria of the weevil *Sitophilus oryzae*: a peculiar G + C content of an endocytobiotic DNA. *J. Mol. Evol.* **47**, 52–61 (1998).
46. Eberle, M. W. & McLean, D. L. Initiation and orientation of the symbiote migration in the human body louse *Pediculus humanus* L. *J. Insect Physiol.* **28**, 417–422 (1982).
47. Eberle, M. W. & McLean, D. L. Observation of symbiote migration in human body lice with scanning and transmission electron microscopy. *Can. J. Microbiol.* **29**, 755–762 (1983).
48. Perotti, M. A., Allen, J. M., Reed, D. L. & Braig, H. R. Host-symbiont interactions of the primary endosymbiont of human head and body lice. *FASEB* **21**, 1058–1066 (2007).
49. Buchner, P. *Endosymbiosis of animals with plant microorganisms* (Wiley & Sons, New York, 1965).
50. Hinde, R. The control of the mycetome symbiotes of the aphids *Brevicoryne brassicae*, *Myzus persicae*, and *Macrosiphum rosae*. *J. Insect Physiol.* **17**, 1791–1800 (1971).
51. Moran, N. A., McCutcheon, J. P. & Nakabachi, A. Genomics and evolution of heritable bacterial symbionts. *Annu. Rev. Genet.* **42**, 165–190 (2008).
52. Moya, A., Peretó, J., Gil, R. & Latorre, A. Learning how to live together: genomic insights into prokaryote–animal symbioses. *Nature Rev. Genet.* **9**, 218–229 (2008).
53. Akman, L. *et al.* Genome sequence of the endocellular obligate symbiont of tsetse flies, *Wigglesworthia glossinidia*. *Nature Genet.* **32**, 402–407 (2002).
54. Attardo, G. M. *et al.* Analysis of milk gland structure and function in *Glossina morsitans*: milk protein production, symbiont populations and fecundity. *J. Insect Physiol.* **54**, 1236–1242 (2008).
55. Douglas, A. E. Mycetocyte symbiosis in insects. *Biol. Rev. Camb. Philos. Soc.* **64**, 409–434 (1989).
56. Usher, K. M., Sutton, D. C., Toze, S., Kuo, J. & Fromont, J. Inter-generational transmission of microbial symbionts in the marine sponge *Chondrilla australiensis* (Demospongiae). *Mar. Freshw. Res.* **56**, 125–131 (2005).
57. Usher, K. M., Kuo, J., Fromont, J. & Sutton, D. C. Vertical transmission of cyanobacterial symbionts in the marine sponge *Chondrilla australiensis* (Demospongiae). *Hydrobiologia* **461**, 15–23 (2001).
58. Schmitt, S., Angermeier, H., Schiller, R., Lindquist, N. & Hentschel, U. Molecular microbial diversity survey of sponge reproductive stages and mechanistic insights into vertical transmission of microbial symbionts. *Appl. Environ. Microbiol.* **74**, 7694–7708 (2008).
59. Herbert, E. E. & Goodrich-Blair, H. Friend and foe: the two faces of *Xenorhabdus nematophila*. *Nature Rev. Microbiol.* **5**, 634–646 (2007).
60. Cary, S. C. Vertical transmission of a chemoautotrophic symbiont in the protobranch bivalve, *Solemya reidi*. *Mol. Marine Biol. Biotechnol.* **3**, 121–130 (1994).
61. Gustafson, R. G. & Reid, R. G. B. Larval and post-larval morphogenesis in the gutless protobranch bivalve *Solemya reidi* (Cryptodonta: Solemyidae). *Mar. Biol.* **97**, 373–387 (1988).
62. Gustafson, R. G. & Reid, R. G. B. Association of bacteria with larvae of the gutless protobranch bivalve *Solemya reidi* (Cryptodonta: Solemyidae). *Mar. Biol.* **97**, 389–401 (1988).
63. Krueger, D. M., Gustafson, R. G. & Cavanaugh, C. M. Vertical transmission of chemoautotrophic symbionts in the bivalve *Solemya velum* (Bivalvia: Protobranchia). *Biol. Bull.* **190**, 195–202 (1996).

64. Giere, O. & Langheld, C. Structural organisation, transfer and biological fate of endosymbiotic bacteria in gutless oligochaetes. *Mar. Biol.* **93**, 641–650 (1987).
65. Woyke, T. *et al.* Symbiosis insights through metagenomic analysis of a microbial consortium. *Nature* **443**, 950–955 (2006).
66. Moran, N. A. & Dunbar, H. E. Sexual acquisition of beneficial symbionts in aphids. *Proc. Natl Acad. Sci. USA.* **103**, 12803–12806 (2006).
67. Miura, T. *et al.* A comparison of parthenogenetic and sexual embryogenesis of the pea aphid *Acyrtosiphon pisum* (Hemiptera: Aphidoidea). *J. Exp. Zool.* **295B**, 59–81 (2003).
68. Serbus, L. R., Casper-Lindley, C., Landmann, F. & Sullivan, W. The genetics and cell biology of *Wolbachia*-host interactions. *Annu. Rev. Genet.* **42**, 1–25 (2008).
69. Gottlieb, Y. *et al.* Inherited intracellular ecosystem: symbiotic bacteria share bacteriocytes in whiteflies. *FASEB J.* **22**, 2591–2599 (2008).
70. Cheng, Q. & Aksoy, S. Tissue tropism, transmission and expression of foreign genes *in vivo* in midgut symbionts of tsetse flies. *Insect Mol. Biol.* **8**, 125–132 (1999).
71. Toh, H. *et al.* Massive genome erosion and functional adaptations provide insights into the symbiotic lifestyle of *Sodalis glossinidius* in the tsetse host. *Genome Res.* **16**, 149–156 (2006).
72. Sharp, K. H., Davidson, S. K. & Haygood, M. G. Localization of ‘*Candidatus* Endobugula sertula’ and the bryostatins throughout the life cycle of the bryozoan *Bugula neritina*. *ISME J.* **1**, 693–702 (2007).
73. Hirose, E. Plant rake and algal pouch of the larvae in the tropical ascidian *Diplosoma similis*: an adaptation for vertical transmission of photosynthetic symbionts *Prochloron* sp. *Zool. Sci.* **17**, 233–240 (2000).
74. Hirose, E. & Fukuda, T. Vertical transmission of photosymbionts in the colonial ascidian *Didemnum molle*: the larval tunic prevents symbionts from attaching to the anterior part of larvae. *Zool. Sci.* **23**, 669–674 (2006).
75. Hirose, E., Adachi, R. & Kuze, K. Sexual reproduction of the *Prochloron*-bearing ascidians, *Trididemnum cyclops* and *Lissoclinum bistratum*, in subtropical waters: seasonality and vertical transmission of photosymbionts. *J. Mar. Biolog. Assoc. U.K.* **86**, 175–179 (2006).
76. Hirose, E. & Hirose, M. Morphological process of vertical transmission of photosymbionts in the colonial ascidian *Trididemnum miniatum* Kott, 1977. *Mar. Biol.* **150**, 359–367 (2007).
77. Xu, J. *et al.* A genomic view of the human–*Bacteroides thetaiotaomicron* symbiosis. *Science* **299**, 2074–2076 (2003).
78. Sonnenburg, J. L., Angenent, L. T. & Gordon, J. I. Getting a grip on things: how do communities of bacterial symbionts become established in our intestine? *Nature Immunol.* **5**, 569–573 (2004).
79. Ley, R. E., Peterson, D. A. & Gordon, J. I. ecological and evolutionary forces shaping microbial diversity in the human intestine. *Cell* **124**, 837–848 (2006).
